# Supplementary material
Source: publisher site journal article supplement (https://www.dovepress.com/article/314304)
Supplement: Supplementary file 1 [file get_supplementary_file.php]

Supporting information to: “Foveal avascular zone does not correspond to choroidal characteristics in patients with diabetic retinopathy: a single-center cross-sectional analysis”

Patryk Sidorczuk,1 Barbara Pieklarz,1 Joanna Konopinska,1 Emil Saeed,1 Zofia Mariak,1 and Diana A. Dmuchowska1

1Ophthalmology Department, Medical University of Bialystok, 24a M. Sklodowskiej-Curie, 15-276 Bialystok, Poland

Correspondence should be addressed to Diana A. Dmuchowska; diana.dmuchowska@umb.edu.pl

**Table S1** Baseline characteristics of patients with diabetic retinopathy stratified according to the FAZ size

|  | FAZ size | | p |
| --- | --- | --- | --- |
| **< 0.355mm2** | **> 0.355mm2** |
| Number of patients | 74 | 78 |  |
| Number of eyes | 105 | 105 |  |
| Age, years, mean±SD | 61.93±12.12 | 59.60±12.63 | .249 |
| Sex, female, n (%) | 44 (56.4) | 31 (41.9) | .104 |
| Spherical equivalent, mean±SD | 0.48±1.07 | 0.12±0.95 | .009 |
| DR severity, n (%) |  |  |  |
| NPDR (DR 1-3) | 70 (66.7) | 65 (61.9) | .565 |
| PDR (DR 4-5) | 35 (33.3) | 40 (38.1) |
| CSME, n (%) |  |  |  |
| present | 72 (68.6) | 62 (59.0) | .196 |
| absent | 33 (31.4) | 43 (41.0) |
| PRP, n (%) |  |  |  |
| no | 70 (66.7) | 68 (64.8) | .884 |
| yes | 35 (33.3) | 37 (35.2) |
| FAZ area, mm2, median (Q1;Q3) | 0.25 (0.18;0.31) | 0.51 (0.44;0.64) | <.001 |
| FAZ outline, (%) |  |  |  |
| grade ≤2 | 56 (53.3) | 37 (35.2) | .012 |
| grade ≥3 | 49 (46.7) | 68 (64.8) |

**Notes:** Groups compared with chi-square test for nominal variables and with t-test or Mann-Whitney U test for continuous variables.

**Abbreviations:** FAZ, foveal avascular zone; CSME, clinically significant macular edema; DR, diabetic retinopathy; NPDR, non-proliferative diabetic retinopathy; PDR, proliferative diabetic retinopathy; PRP, panretinal photocoagulation.
